# Supplementary material for: Aza-Wittig access to chiral imidazol(in)es
Source: Royal Society of Chemistry journal article supplement (doi:10.1039/b822436f), 2009-01-01

## Aza-Wittig access to chiral imidazol(in)es

Patrick Loos, Matthias Riedrich, and Hans-Dieter Arndt\*

*Technische Universität Dortmund, Fakultät Chemie, Otto-Hahn-Str. 6,  
D-44221 Dortmund, Germany,*

*and*

*Max-Planck-Institut für Molekulare Physiologie, Otto-Hahn-Str. 11,  
D-44227 Dortmund, Germany*

[hans-dieter.arndt@mpi-dortmund.mpg.de](mailto:hans-dieter.arndt@mpi-dortmund.mpg.de)

FAX: int+49(0)231-133-2498

### Electronic Supporting Information (10 pages)

**1. General procedure for sulfonamide acylation:** The carboxylic acid donor (1.1 equiv.) was dissolved in dry CH<sub>2</sub>Cl<sub>2</sub> (1 M) and cooled to 0°C. HATU (1.1 equiv) and predried Cs<sub>2</sub>CO<sub>3</sub> (1.0 equiv) were added. The suspension was diluted with CH<sub>2</sub>Cl<sub>2</sub> (to 0.25 M) and stirred for 15 minutes. A solution of the sulfonamide (1.0 equiv) in CH<sub>2</sub>Cl<sub>2</sub> (0.25 M) and more predried Cs<sub>2</sub>CO<sub>3</sub> (3 equiv.) were added. The reaction mixture was stirred at 0°C until conversion was complete (1-4 h, TLC control). The mixture was partitioned against 5% citric acid (final pH 5), the organic layer concentrated and the product retrieved by silica gel chromatography (*n*-hexane/EtOAc).

**2. General procedure for aza-Wittig ring closure:** The *N*-acylated sulfonamide was dissolved in THF or 2,6-lutidine (20 mM) and cooled to –20 °C. PPh<sub>3</sub> (1.5 equiv.) was added and the mixture was heated to 80 °C. After complete conversion (1-6 h, TLC control) the solvent was removed in vacuo and the product was purified by silica gel chromatography (*n*-hexane/EtOAc).

**3. <sup>1</sup>H-NMR spectra** of compounds **11a-g**, **12a-g**, **13a-c**, and **16** (9 pages).

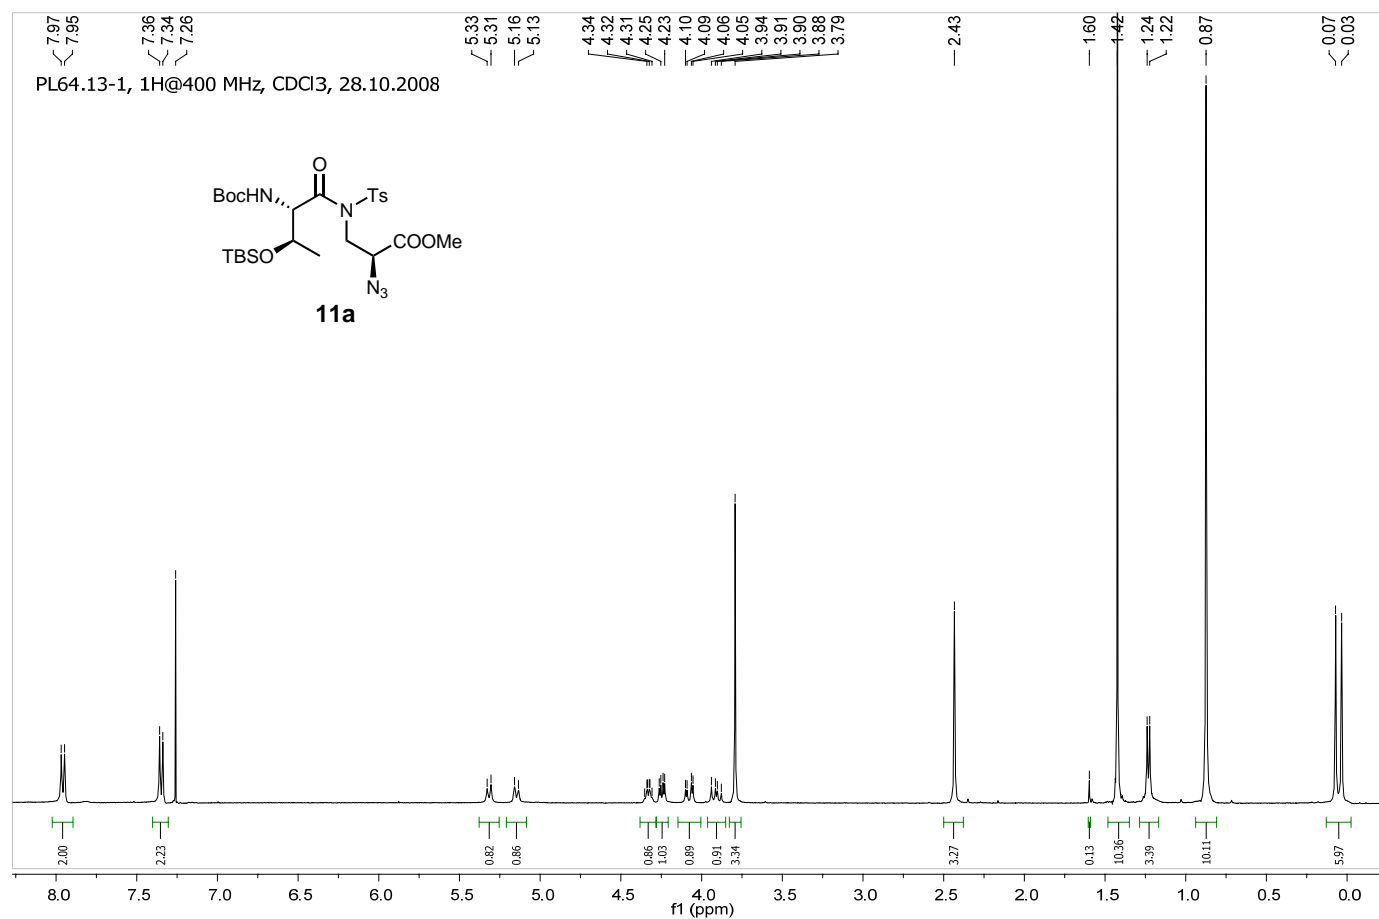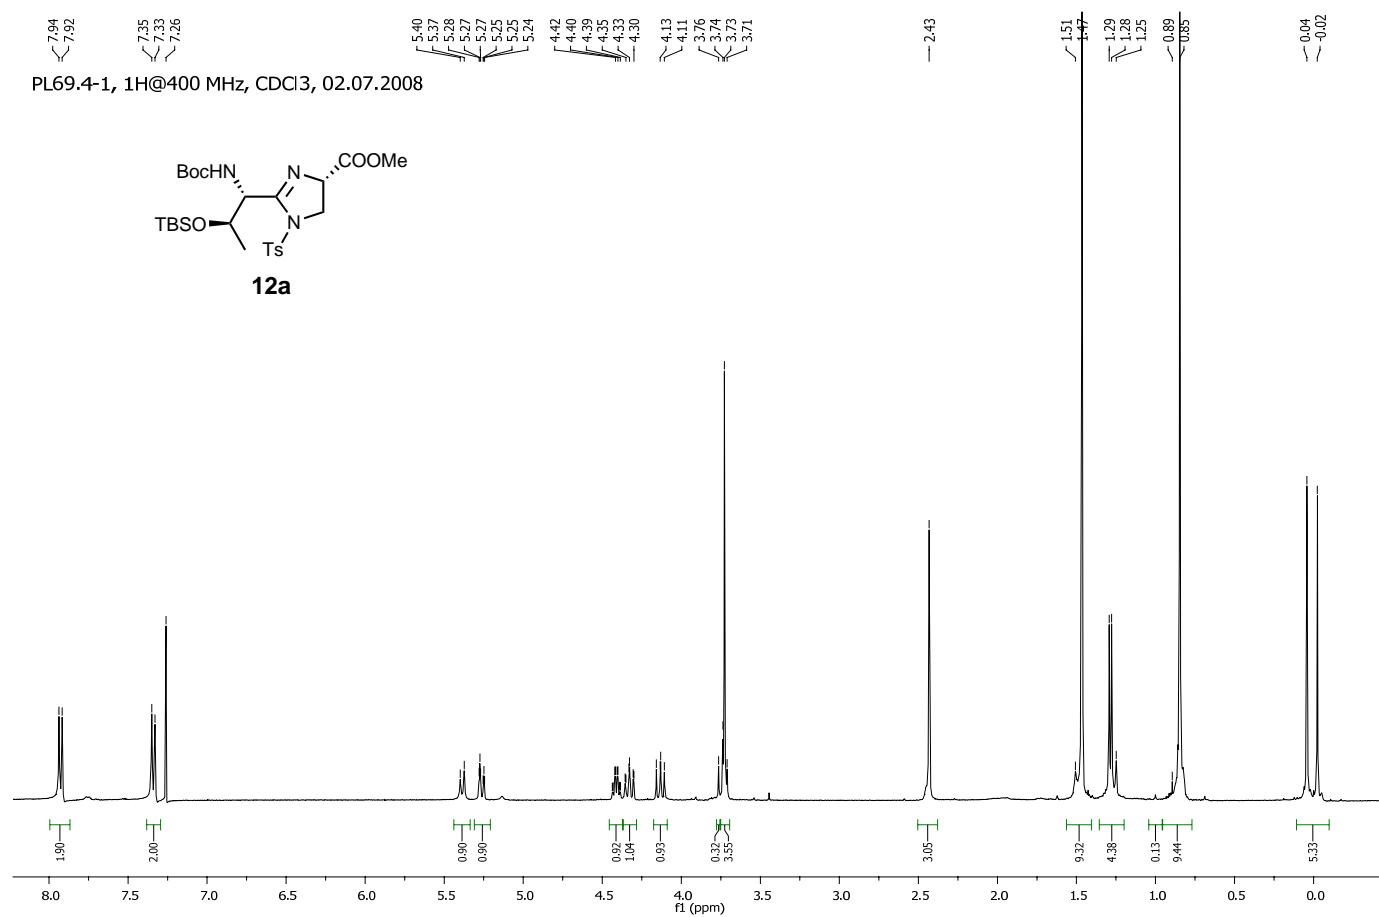

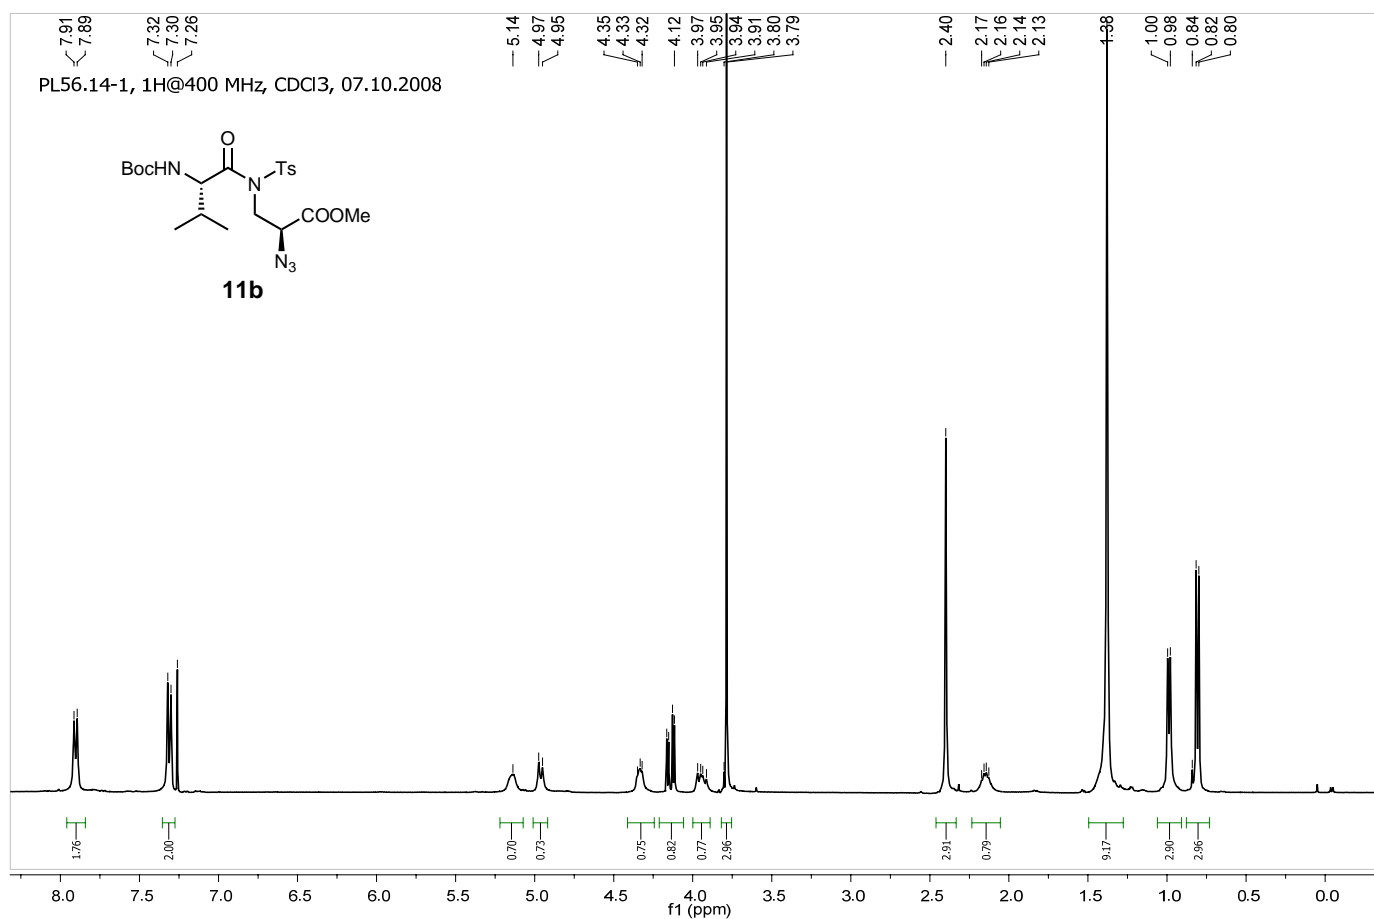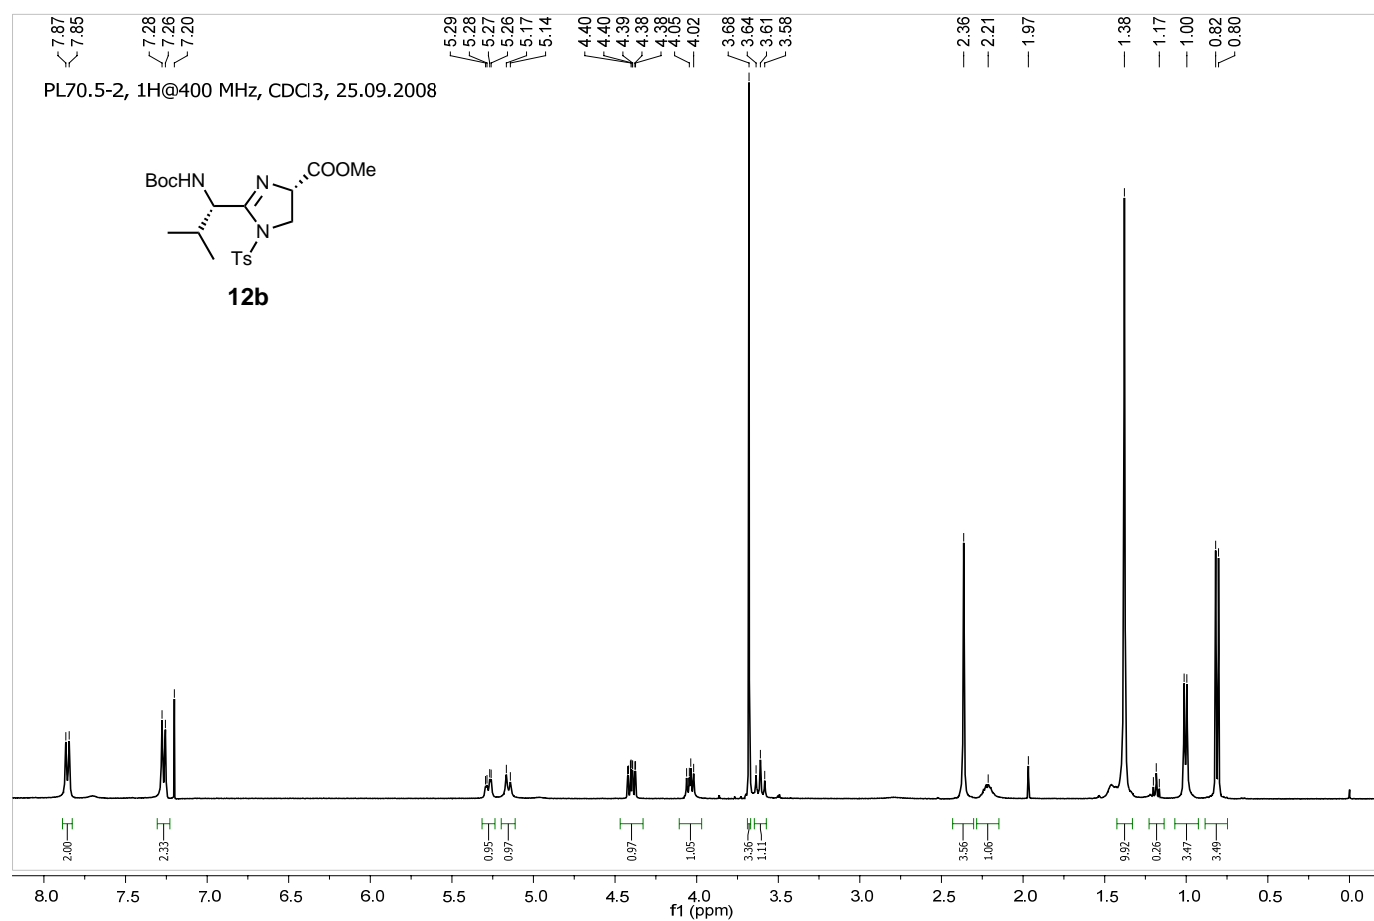

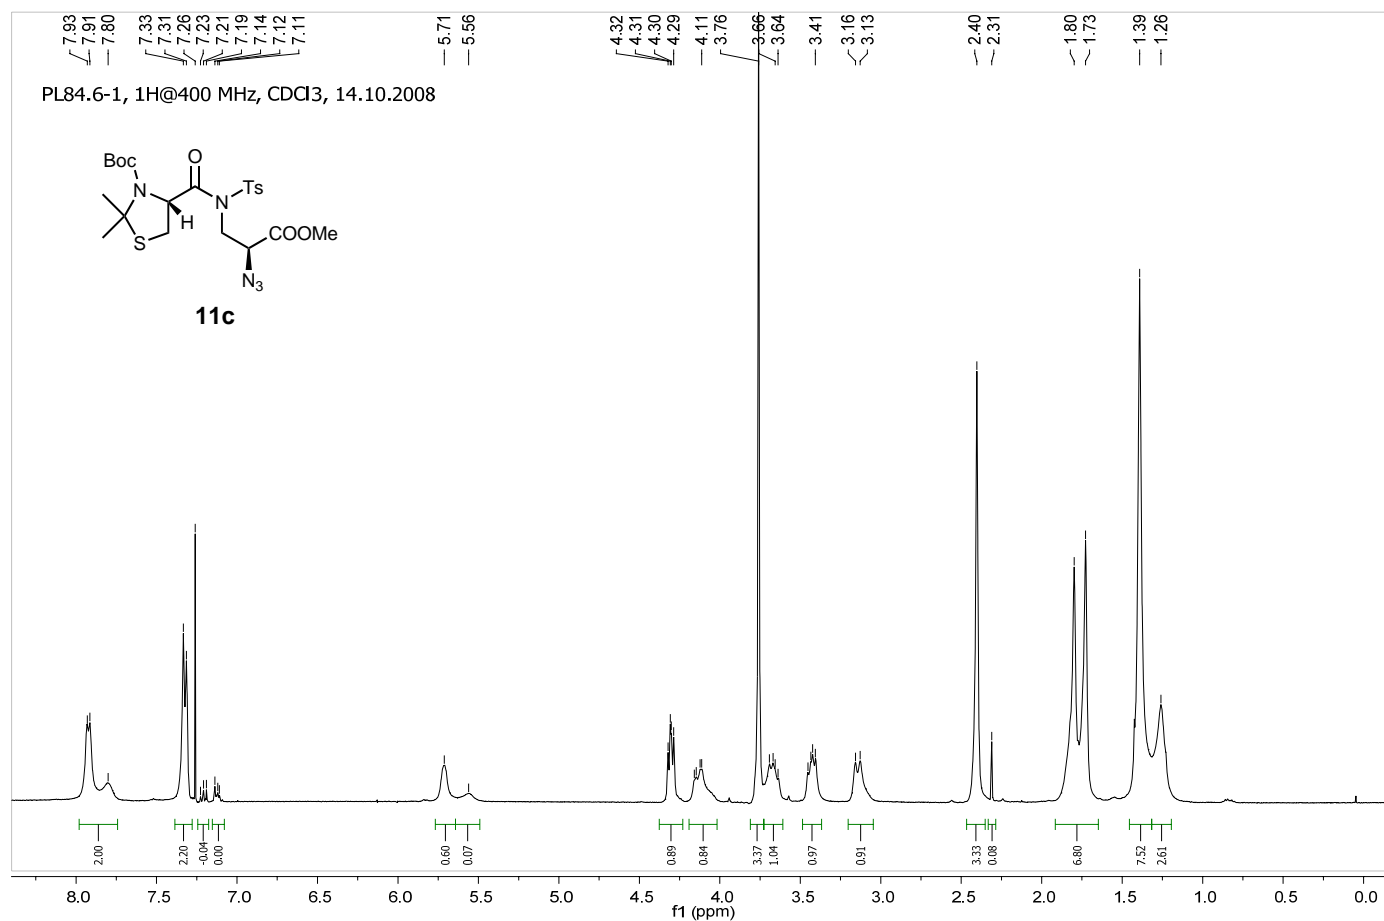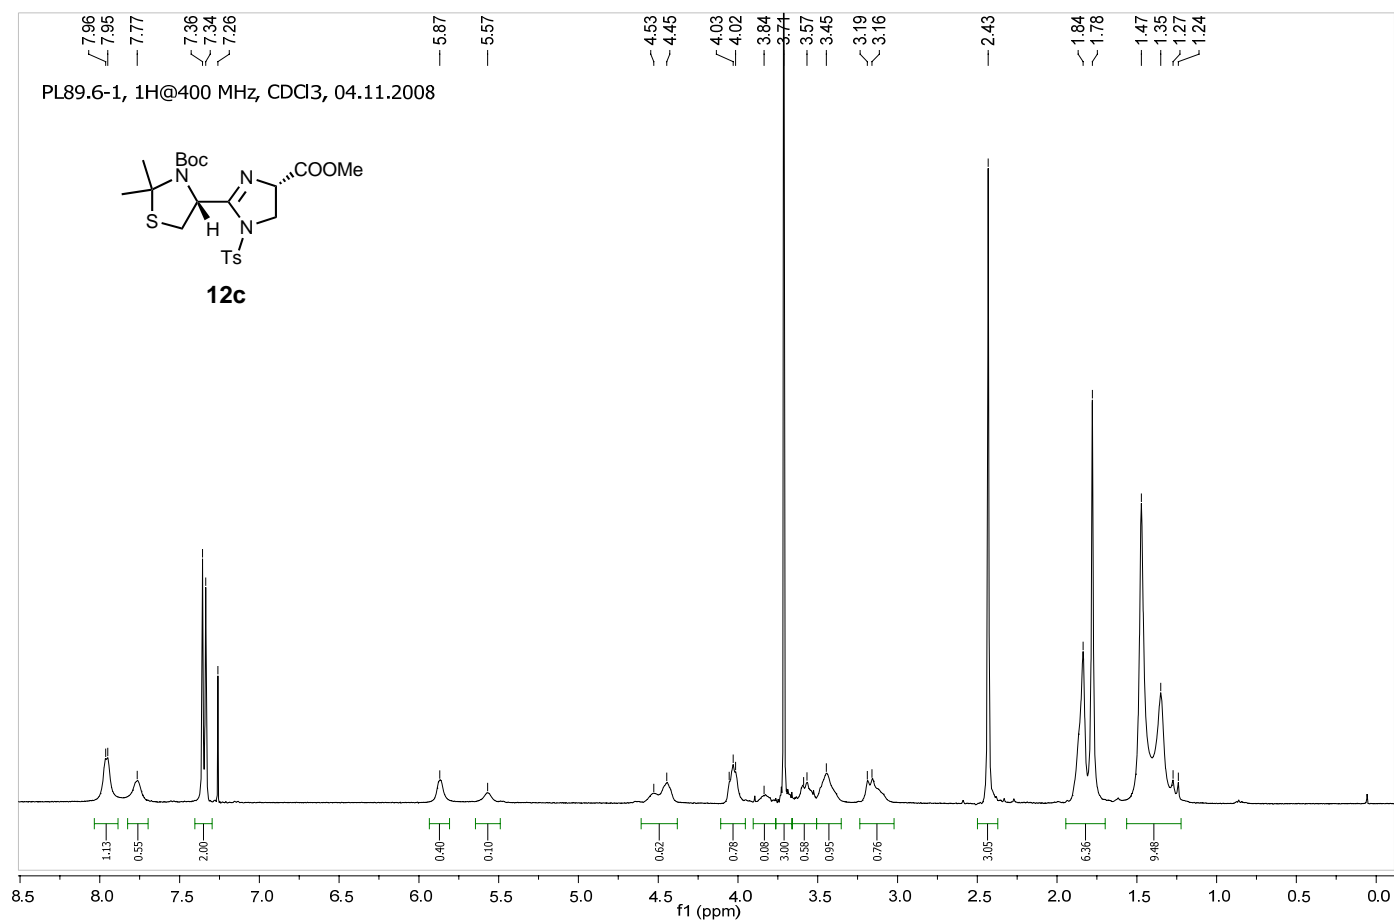

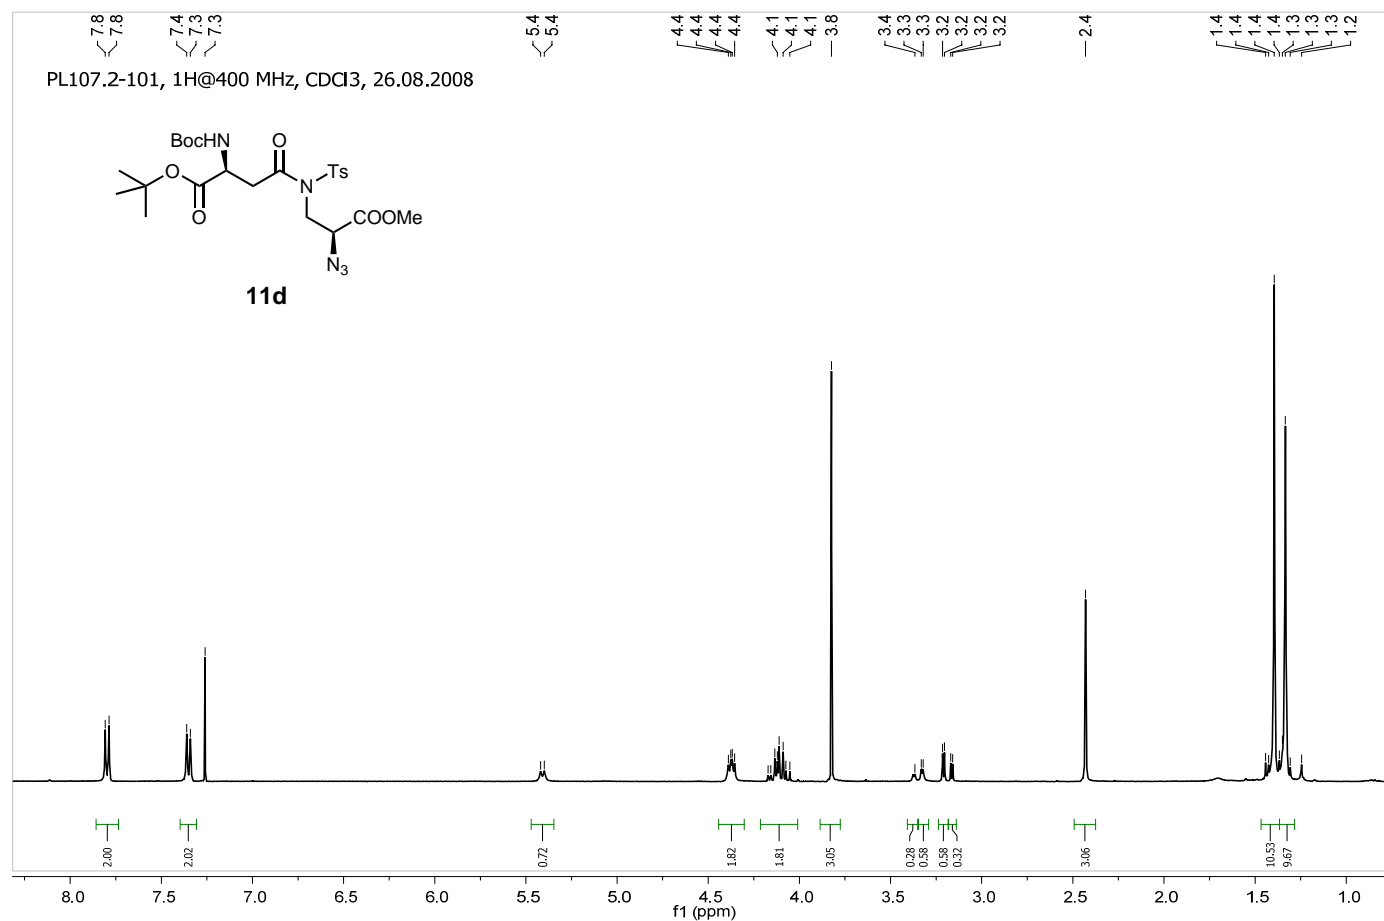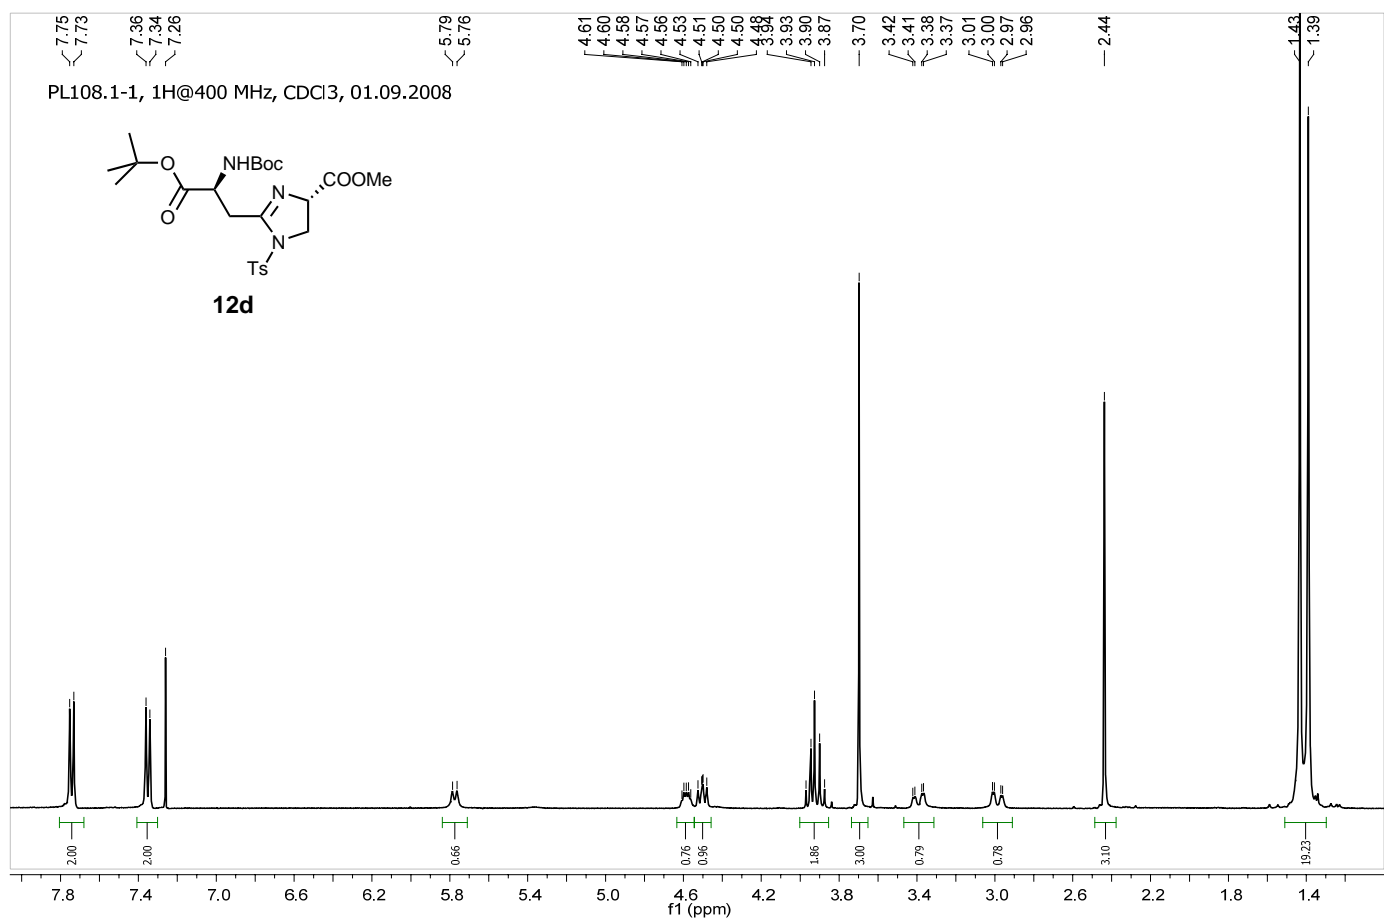

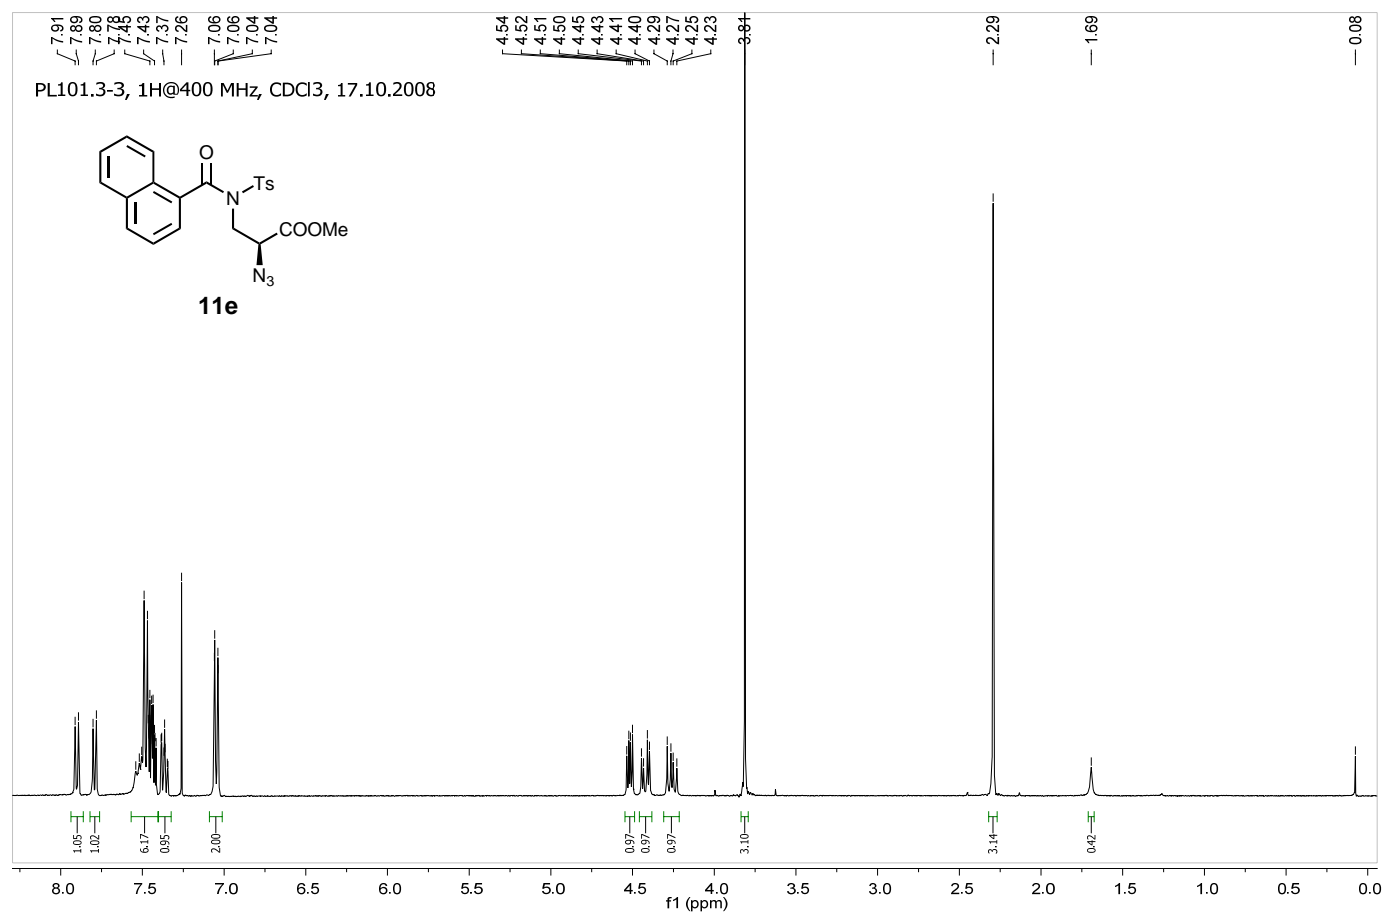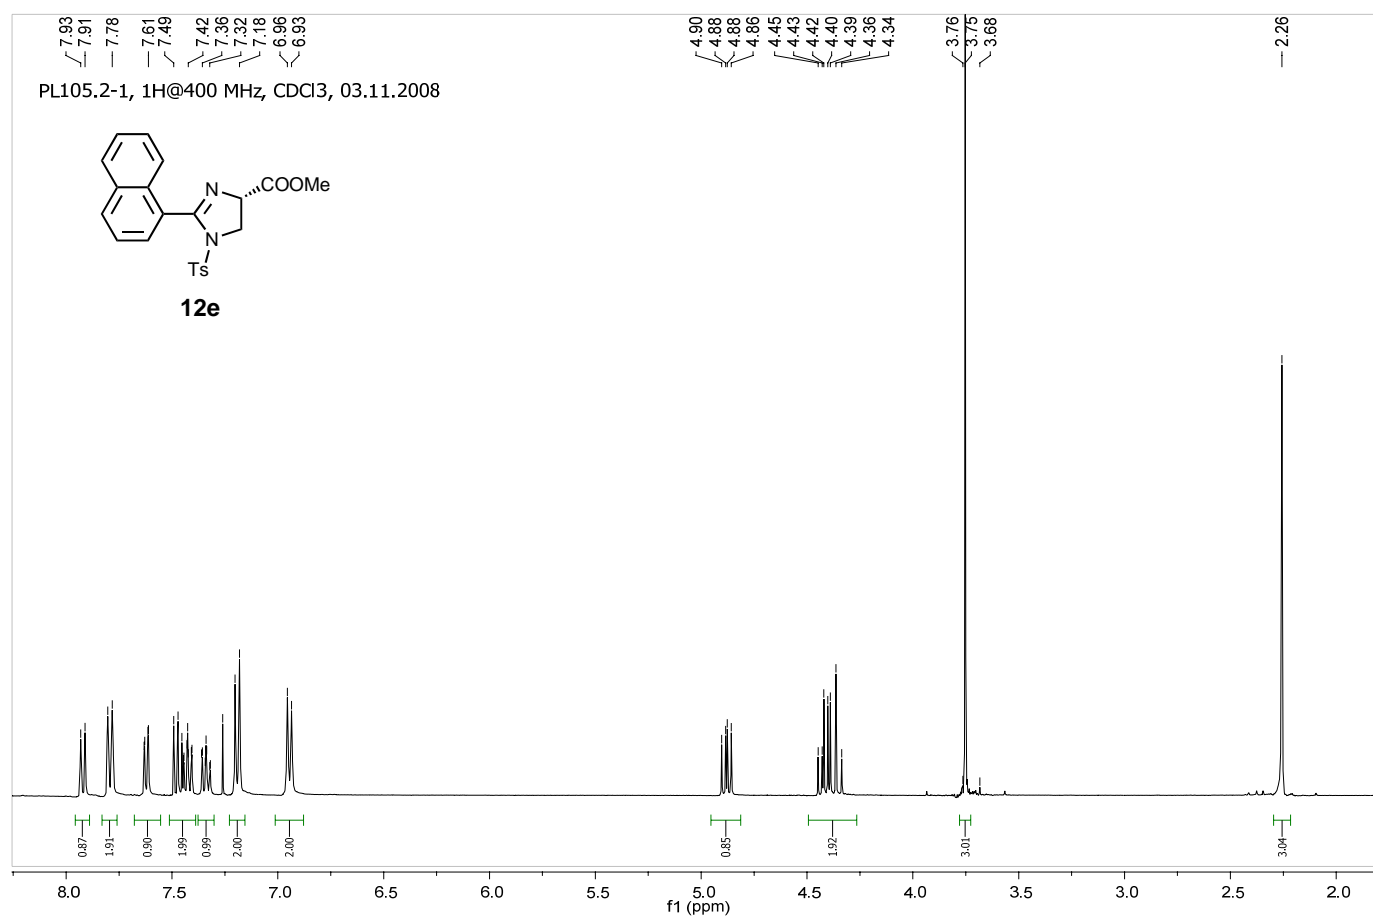



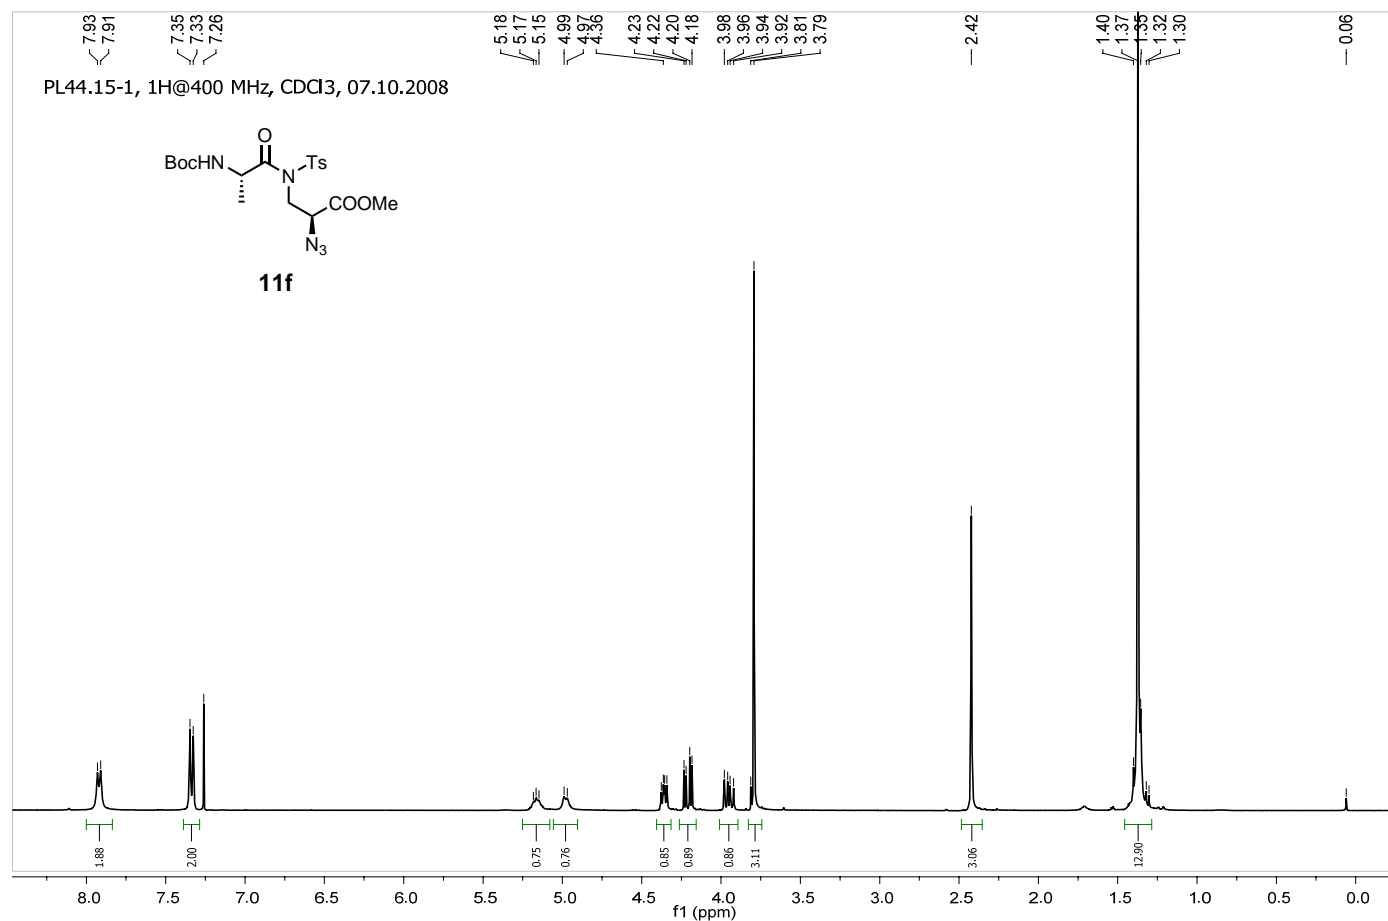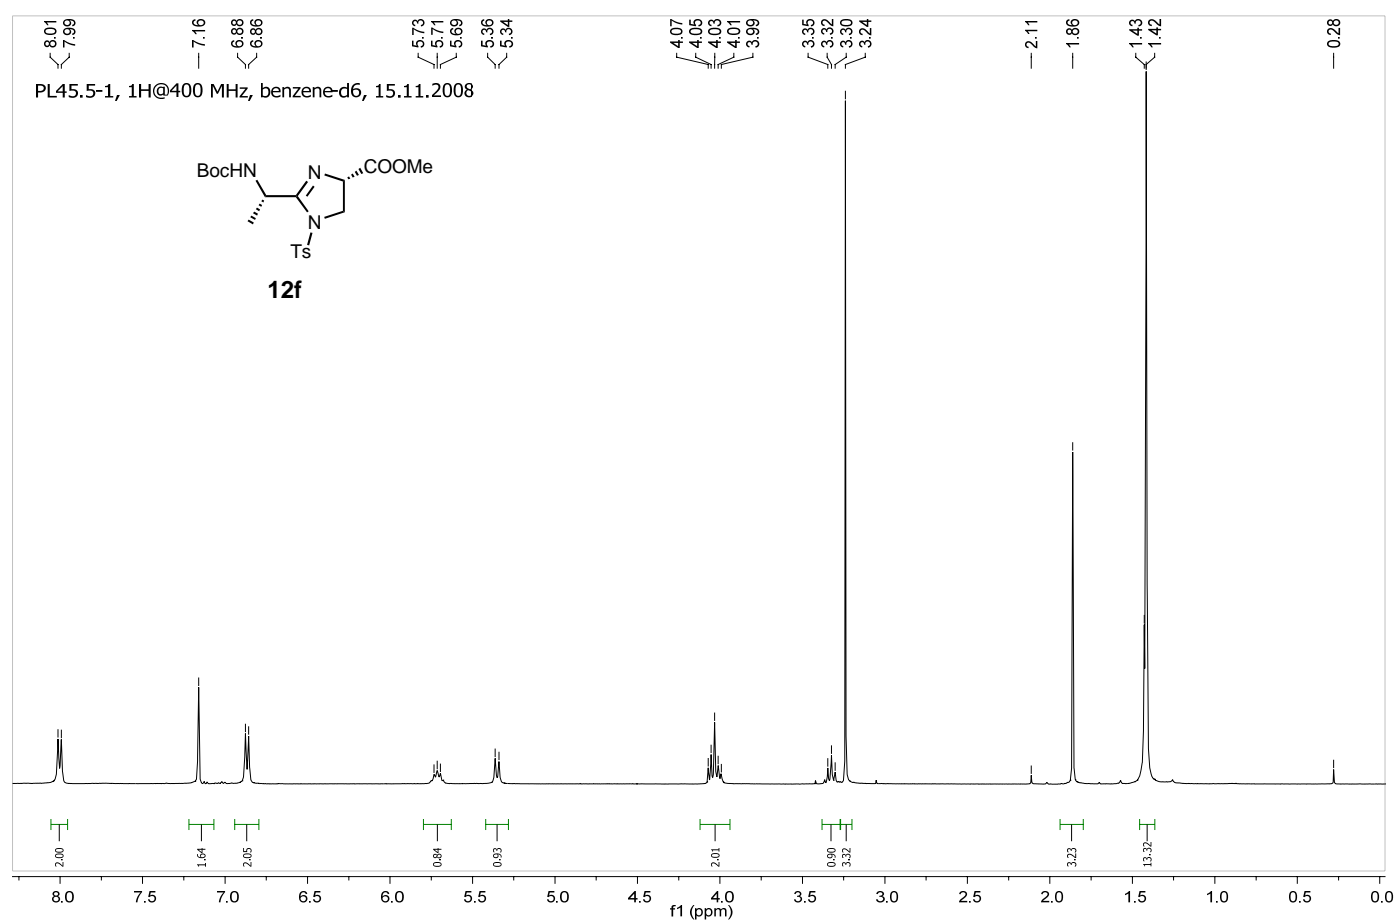



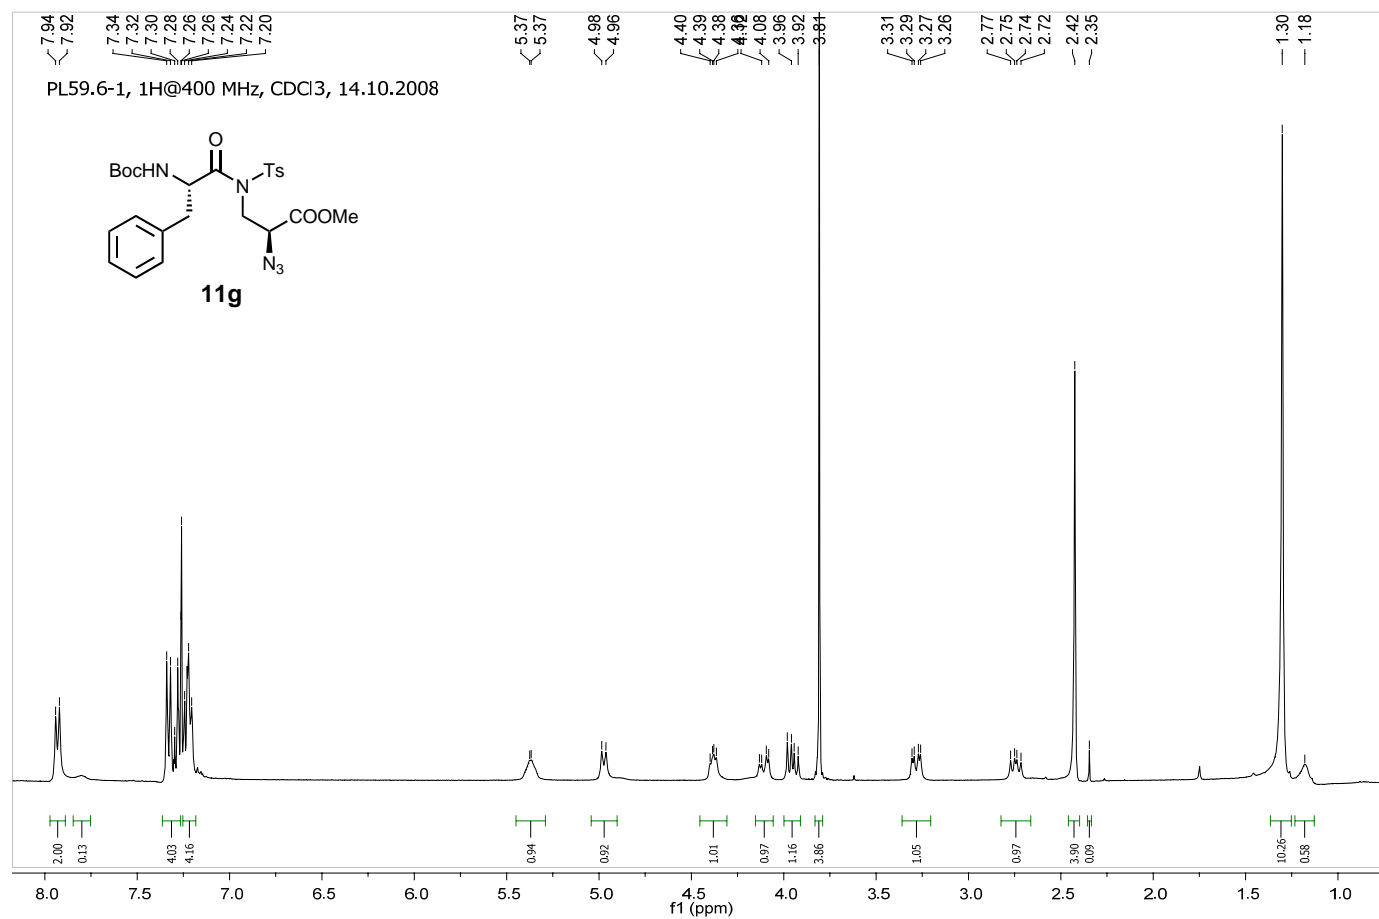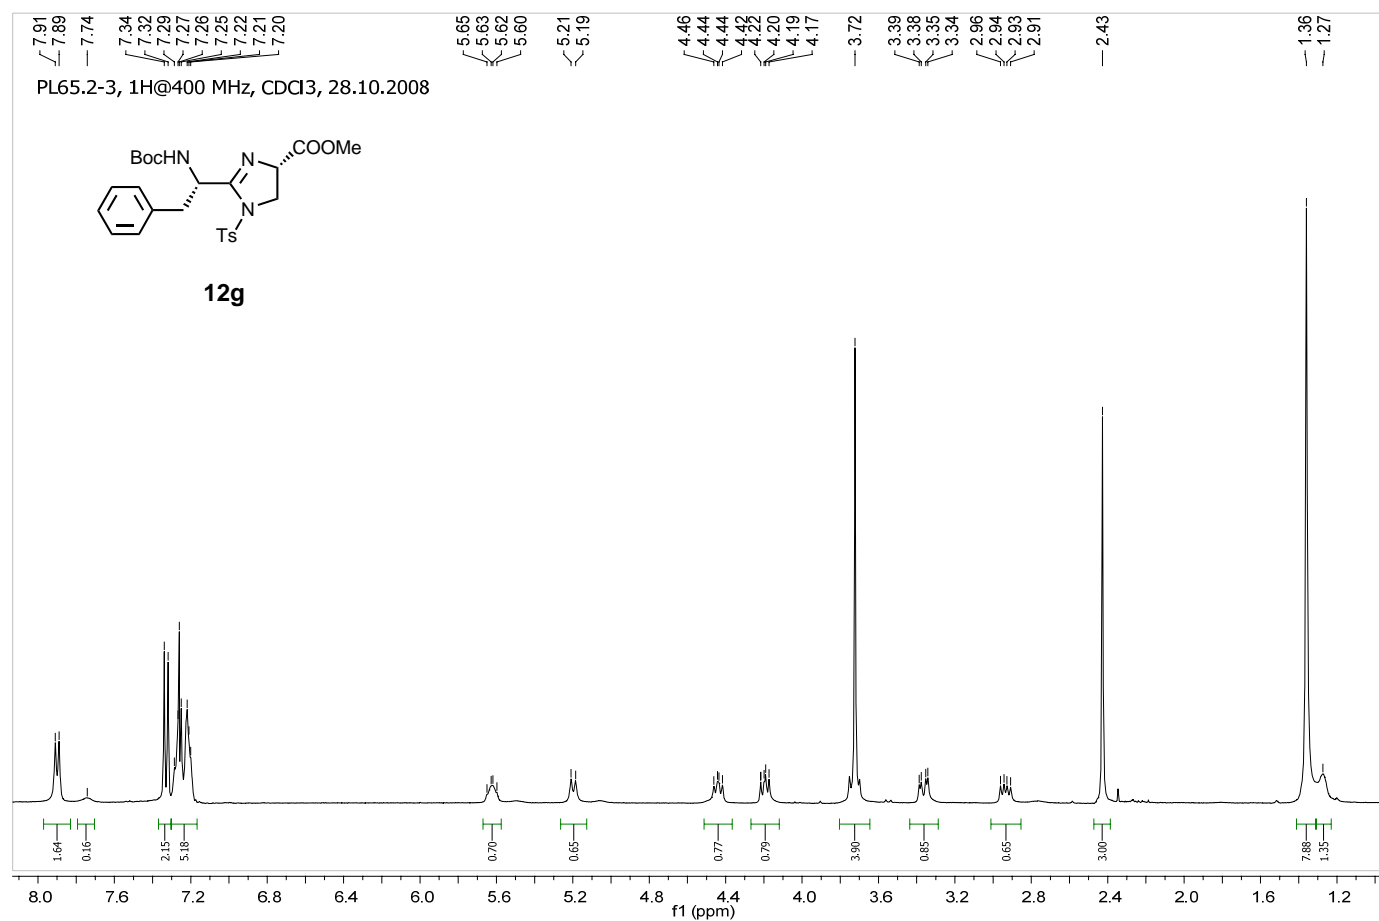

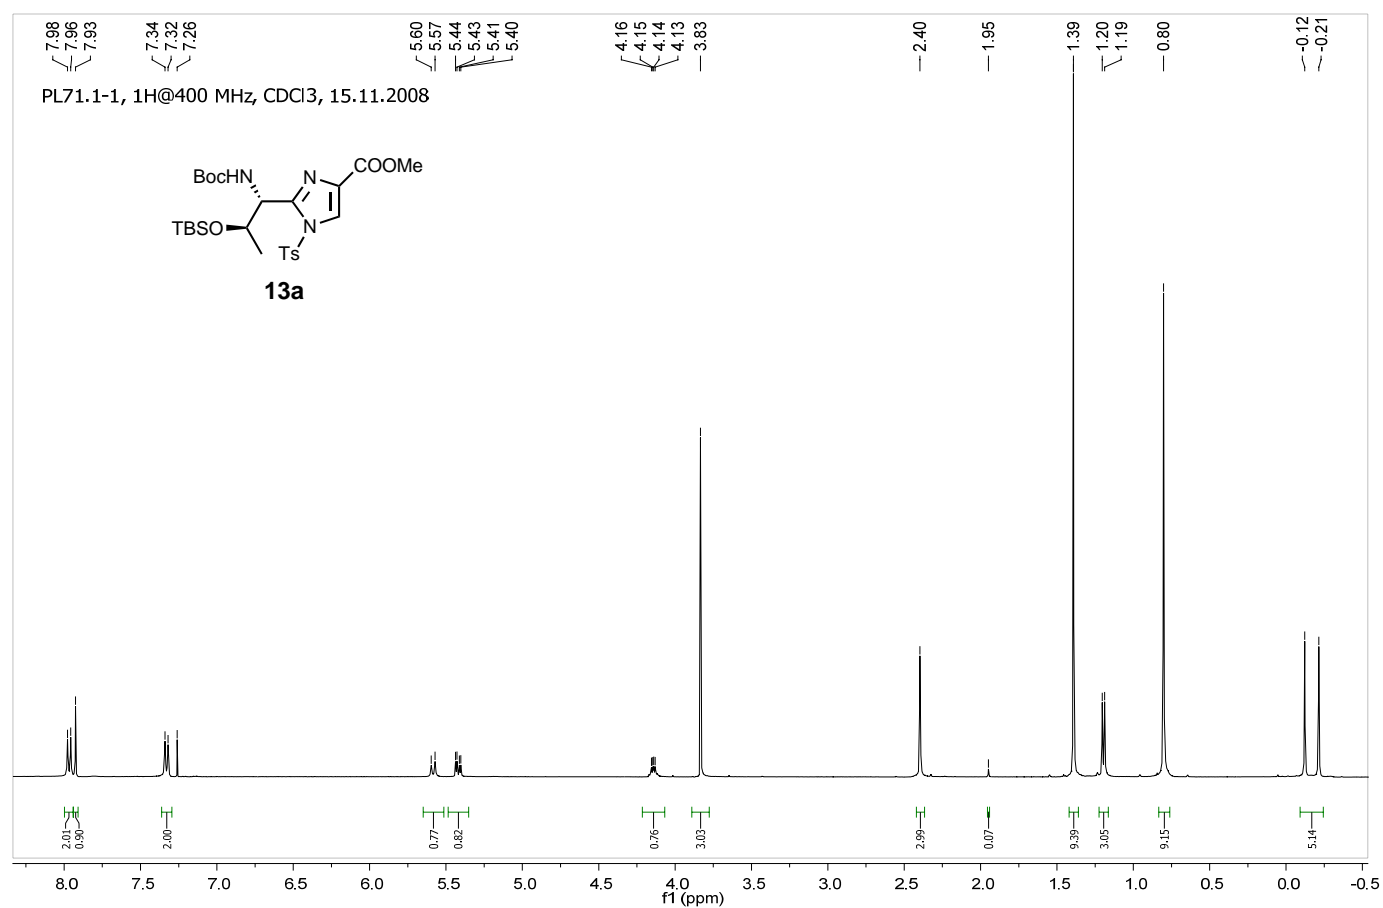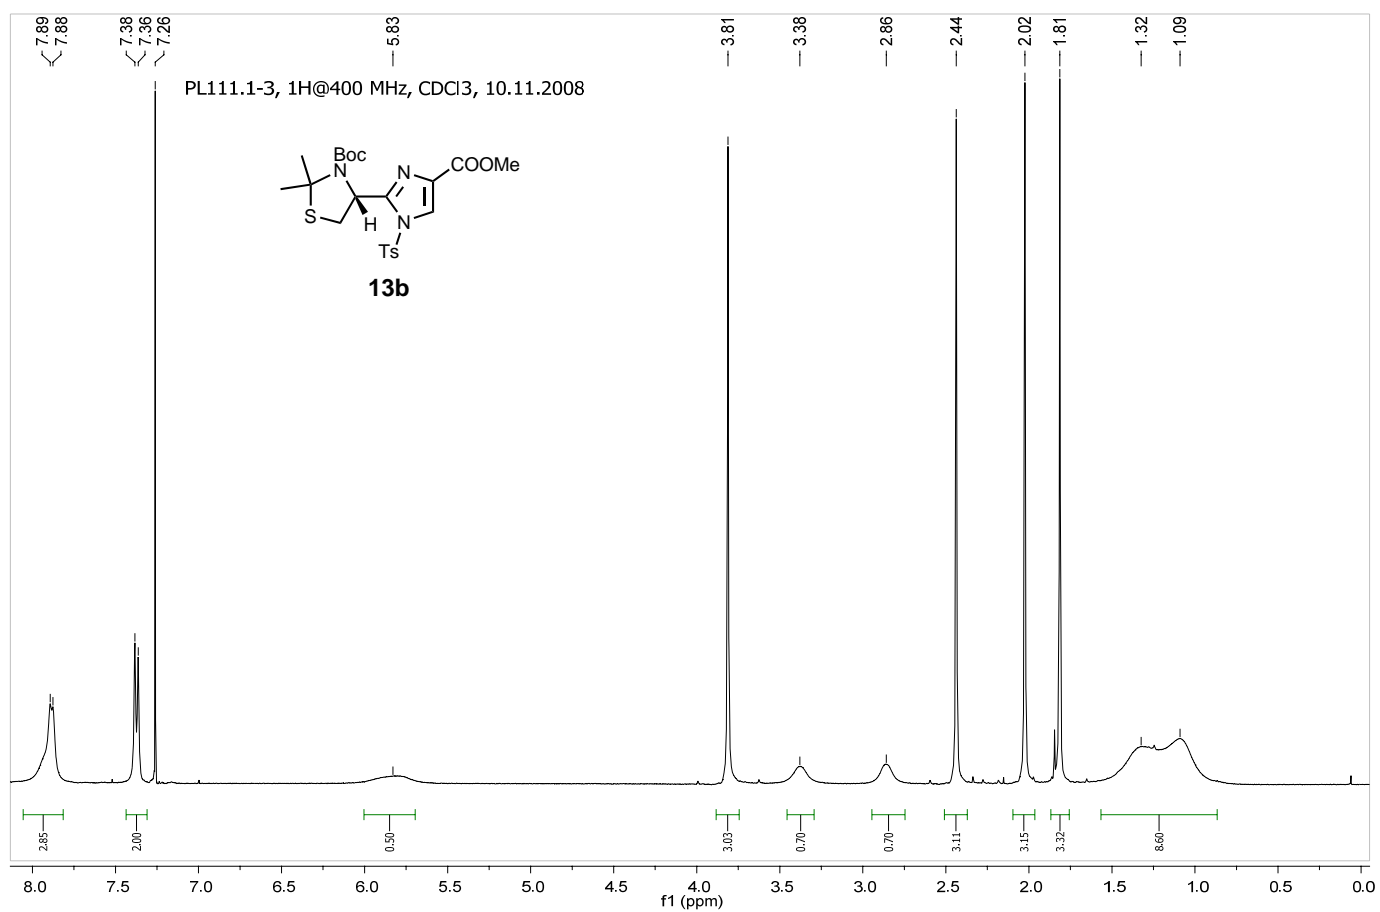

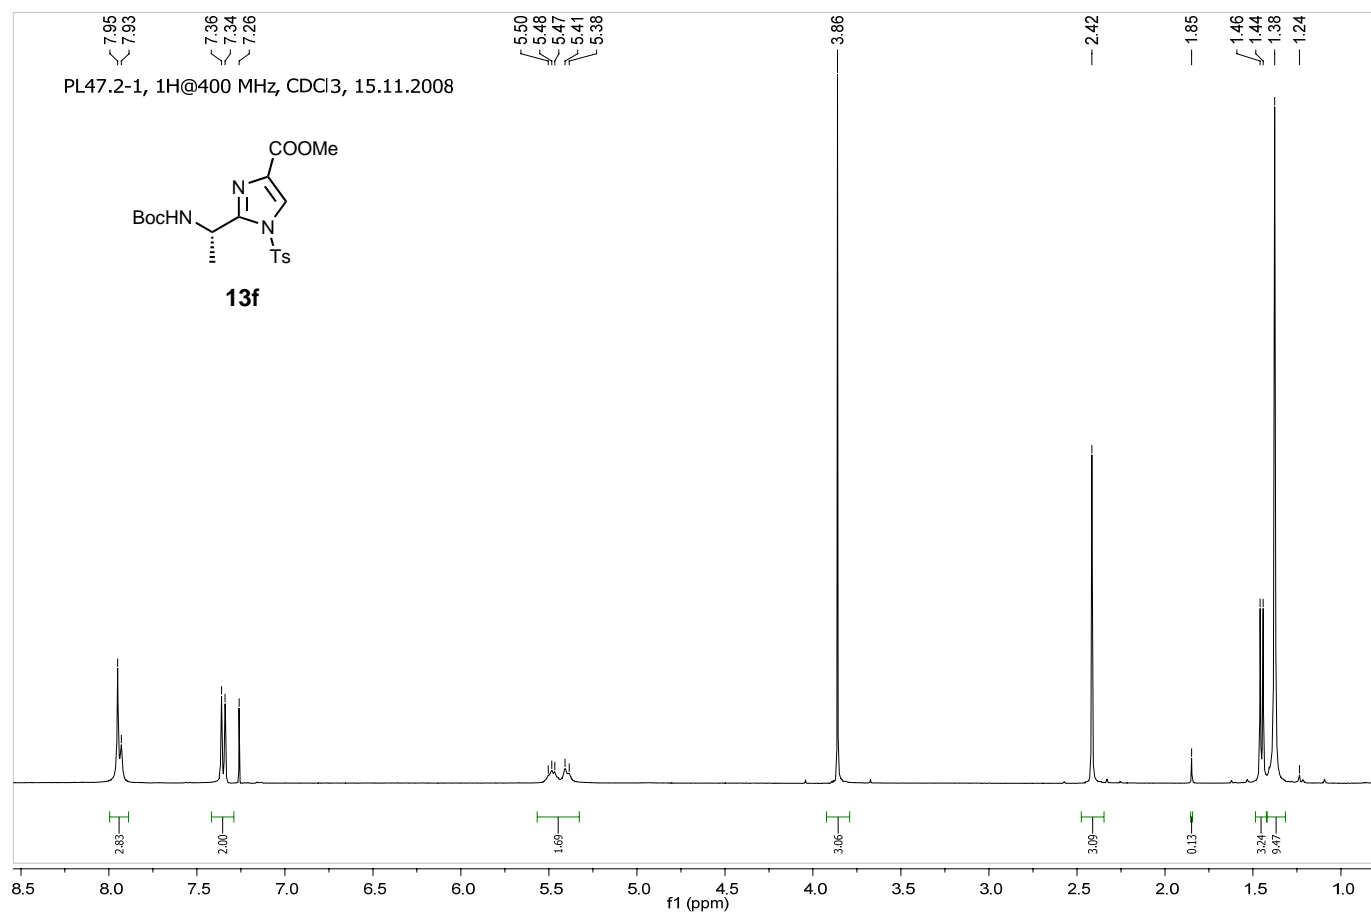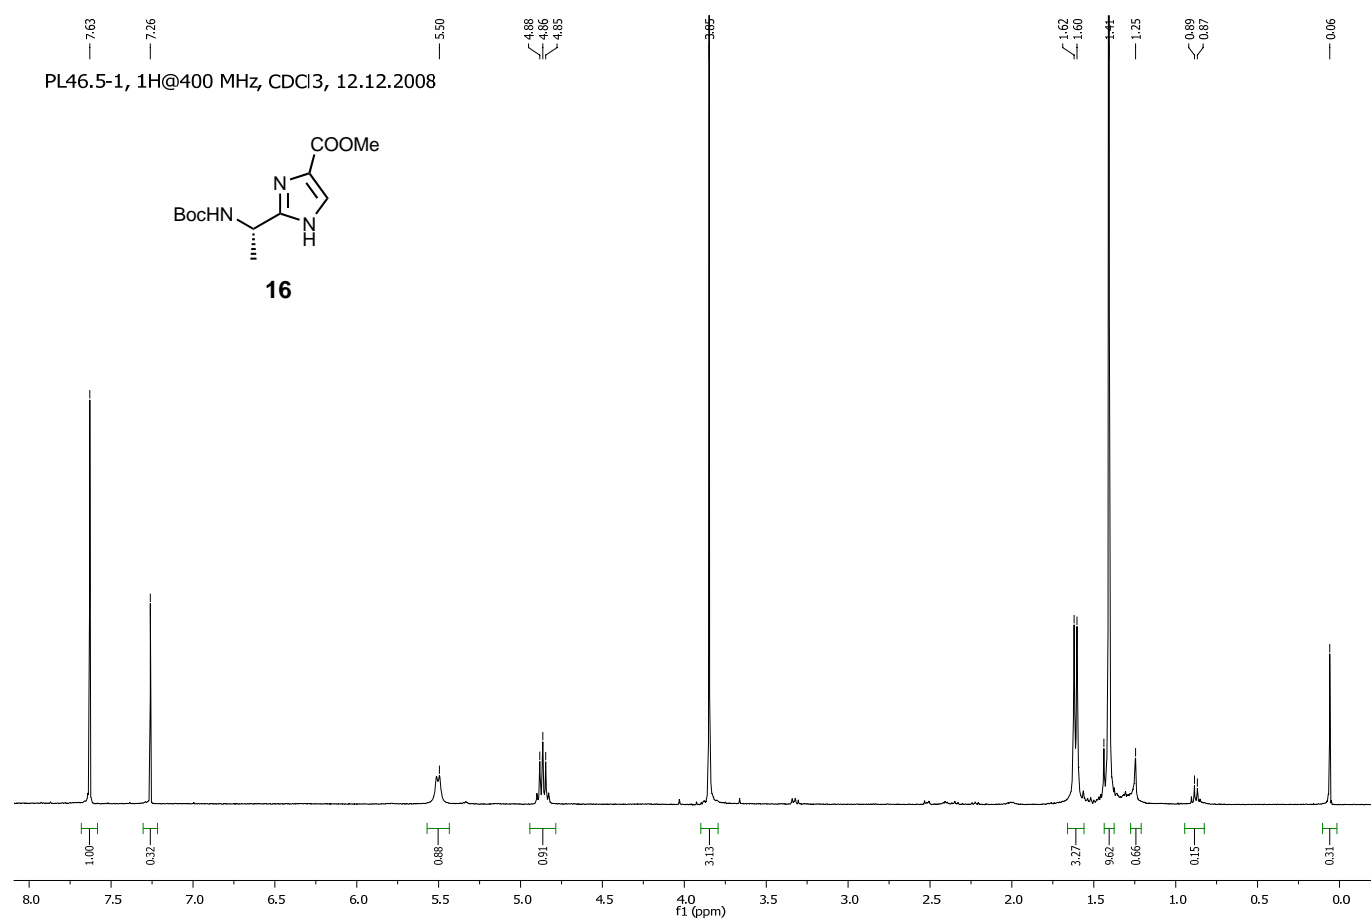

Supplement: b822436f.pdf [file b822436f.pdf]
